# Supplementary material for: Human Germ Cell Specification via Combinatorial Expression of Prioritized Transcription Factors
Source: Research Square preprint supplement (doi:10.21203/rs.3.rs-2652895/v1), 2023-03-09
Supplement: Supplementary file 1 [file a5672eeb2cac7b4df6c9a112.xlsx]

## Sheet: Sheet1
Gene Symbol	Gene alias	Isoform Used	Gene Name	Added as a Control	Known Function in Germ Cell Development
CARHSP1	ENSG00000153048	Canonical	calcium regulated heat stable protein 1 [Source:HGNC Symbol;Acc:HGNC:17150]	No	calcium regulated heat stable protein, Implicated as being in charge of the gene expression network in male migrating fetal germ cells with HMGN3 (Li and Qiao 2017)
CCDC88A	ENSG00000115355	Isoform 1	coiled-coil domain containing 88A [Source:HGNC Symbol;Acc:HGNC:25523]	No	No known Germ Cell Role. The Girdin protein, is highly expressed in the testis and regulates cell survival and proliferation and Is involved in neural development (Wang et al 2018)
CENPA	ENSG00000115163	Isoform B	centromere protein A [Source:HGNC Symbol;Acc:HGNC:1851]	No	a Centromere binding protein involved in epigenetic silencing and nucleosome re-organization and centromeric regulation (Folco and Allshire 2008) Is the basis of centromere inheritance through the female germline and oocyte pathway, is essential for fertility and centromere identity (Smoak and Black 2017) Likely play important role between oogonia and primary oocyte (Das and Black 2018)
CLOCK	ENSG00000134852	Canonical	clock circadian regulator [Source:HGNC Symbol;Acc:HGNC:2082]	No	Implicated in playing a role in male mitotic fetal germ cells (Li and Qiao 2017), is a core regulator of the circadian rhythm, works as an acetyltransferase with epeigentic remodeling activity (Nakahata and Sassone 2008) Have been shown to activate retinoic acid receptors (Pretiner and Schibler 2002) Can regulate estrogen cycles and pregnancy (Miller and Takahashi 2004)
CRX	ENSG00000105392	Canonical	cone-rod homeobox [Source:HGNC Symbol;Acc:HGNC:2383]	No	No known Germ Cell Role. Cone-rod homeobox protein that is a photoreceptor specific TF and mutations cause a variety of eye related diseases (Freund and McInnes 1997)
DLX5	ENSG00000105880	Canonical	distal-less homeobox 5 [Source:HGNC Symbol;Acc:HGNC:2918]	No	No known Germ Cell Role. Is a putative oncogene (J Xu 2009), can activate Myc (X Wang 2014), has been implicated in developmental limb diseases, can be imprinted and hyper-methylated (Johnson 2018)
DMTF1	ENSG00000135164	Isoform A	cyclin D binding myb like transcription factor 1 [Source:HGNC Symbol;Acc:HGNC:14603]	No	No known Germ Cell Role. Cyclin D binding TF, involved in cyclin dependent response. Truncated forms cause alternations in macrophage differentiation (Tschan et al. 2003), involved in cell cycle arrest and apopotosis and is a tumor suppressor (Mallakin and Inoue 2007)
DYNLL1	ENSG00000088986	Isoform 1	dynein light chain LC8-type 1 [Source:HGNC Symbol;Acc:HGNC:15476]	Yes	Core factor in TF network driving mouse oogenesis (Hamazaki et al. 2020)
ETV5	ENSG00000244405	Canonical	ETS variant transcription factor 5 [Source:HGNC Symbol;Acc:HGNC:3494]	No	Is overexpressed in secondary ovarian follicles and may regulate primary to secondary follicle maturation (Y Zhang 2018). Loss leads to female and male sterility, in male loss leads to progressive diminishment of spermatogonia, in females loss leads to ovarian defects (Jamsai 2o13), it is required for sperm stem cell proliferation and renewal (Chen 2005), in females ETV5 is localized to granulosa…
FIGLA	ENSG00000183733	Canonical	folliculogenesis specific bHLH transcription factor [Source:HGNC Symbol;Acc:HGNC:24669]	Yes	Core factor in TF network driving mouse oogenesis (Hamazaki et al. 2020)
HHEX	ENSG00000152804	Canonical	hematopoietically expressed homeobox [Source:HGNC Symbol;Acc:HGNC:4901]	No	Known to be involved in differentiation of the thyroid (Pereira 2015), is repressed by B-catenin and known to play a role in pancreas and liver development (McLin 2007), is repressed by PRDM14 in PGC development (Gillich 2012)
HSF2	ENSG00000025156	Isoform C	heat shock transcription factor 2 [Source:HGNC Symbol;Acc:HGNC:5225]	No	Heat shock transcription factor that is highly expressed in the testis, it is not essential for fertility in mice, HSF1 is implicated in oogenesis and spermatogenesis (McMillan and Benjamin 2002)
KLF2	ENSG00000127528	Canonical	Kruppel like factor 2 [Source:HGNC Symbol;Acc:HGNC:6347]	No	Is overexpressed in secondary ovarian follicles and may regulate primary to secondary follicle maturation (Y Zhang 2018). Is known to be upregulated in PGCs and forms a synergistic epigenetic reprogramming effect with PRDM14 (Gillich 2012)
KMT2C	ENSG00000055609	Canonical	lysine methyltransferase 2C [Source:HGNC Symbol;Acc:HGNC:13726]	No	H3K4 methyltransferase, involved in estrogen dependent gene expression, has oncogenic potential and is involved in breast cancer, is highly mutated and gain of function in breast cancer (Gala and Chandarlapaty 2018)
LHX8	ENSG00000162624	Isoform 1	LIM homeobox 8 [Source:HGNC Symbol;Acc:HGNC:28838]	No	Known Oocyte Marker. Is essential for oocyte development, maturation and survival and loss leads to death of primordial oocyte follicle and failure to transition to primary follicle in mice. It is a negative regulator of the Nobox pathway (Choi 2008).
LYAR	ENSG00000145220	Canonical	Ly1 antibody reactive [Source:HGNC Symbol;Acc:HGNC:26021]	No	Zinc finger domain TF involved in cell growth and proliferation, expressed very highly in immature spermatocytes and only in germline of testis, has oncogenic potential (Su and Weissman 1992)
MTF1	ENSG00000188786	Isoform 1	metal regulatory transcription factor 1 [Source:HGNC Symbol;Acc:HGNC:7428]	No	Metal responsive transcription factor, Can rescue the “Parkin” infertility phenotype of Flies when overexpressed in ovary and seems to play a role in oocyte development, human variant also rescues fly ovarian infertility (Saini and Schaffner 2011)
NANOS3	ENSG00000187556	Canonical	nanos C2HC-type zinc finger 3 [Source:HGNC Symbol;Acc:HGNC:22048]	Yes	Is a known PGC-LC marker (Mitsunaga 2017), loss of BLIMP1 causes down regulation of NANOS3 (Tang 2015) Loss of Nanos3 causes teratoma formation (Schemmer 2013). Is critically important for germ cell development, meiotic progression and maturation of oocytes (Julaton 2011). Is involved in suppression of apoptosis during PGC-migration (Yamaji 2010)
NFATC2	ENSG00000101096	Isoform E	nuclear factor of activated T cells 2 [Source:HGNC Symbol;Acc:HGNC:7776]	No	No known germline role. involved in cytokine signaling and oncogenesis (Szuhai and Hogendoorn 2009)
NFYC	ENSG00000066136	Isoform 1	nuclear transcription factor Y subunit gamma [Source:HGNC Symbol;Acc:HGNC:7806]	No	No known germline role. Can interact with Myc, and has two microRNAs encoded by the intron of this gene that are associated with maintaining the differentiated state of pancreatic islets (Joglekar and Hardikar 2009) Have been identified as oncogenes (Tong and Gilbertson 2015)
NOBOX	ENSG00000106410	Canonical	NOBOX oogenesis homeobox [Source:HGNC Symbol;Acc:HGNC:22448]	No	Ovary homeobox protein, is critically important for ovarian development, loss leads to full sterility, it is a primary activator of oogenesis specific genes and suppressor of spermatogenesis genes (Huntriss and Picton 2006) (Choi and Rajkovic 2007)
NR1D2	ENSG00000174738	Isoform 1	nuclear receptor subfamily 1 group D member 2 [Source:HGNC Symbol;Acc:HGNC:7963]	No	Known as Rev-erBa beta, is involved din energy homeostasis and is regulated by the circadian rhythm and heme, cross talks with orphan nucleoreceptors, likely works with CLOCK and can be oncogenic (RamKrishnan and Muscat 2005)
NR1H2	ENSG00000131408	Isoform 1	nuclear receptor subfamily 1 group H member 2 [Source:HGNC Symbol;Acc:HGNC:7965]	No	Encodes Liver X receptors, a nuclear receptor that directly binds and interacts with retinoic acid receptors (Song and Liao 1995)
NR2C1	ENSG00000120798	Isoform B	nuclear receptor subfamily 2 group C member 1 [Source:HGNC Symbol;Acc:HGNC:7971]	No	Testicular receptor 2, involved in regulating retinoic Acid (RA) signaling and amacrine signaling by SATB2, is a broad repressor but activator of Oct4, implicated in stem cell differentiation (Olivares and Haider 2017)
OTX2	ENSG00000165588	Isoform A	orthodenticle homeobox 2 [Source:HGNC Symbol;Acc:HGNC:8522]	No	Restricts entry to the mouse germline (J Zhang 2018), Is overexpressed in secondary ovarian follicles and may regulate primary to secondary follicle maturation (Y Zhang 2018)
PLAGL2	ENSG00000126003	Canonical	PLAG1 like zinc finger 2 [Source:HGNC Symbol;Acc:HGNC:9047]	No	Zinc finger protein that suppresses cellular differentiation and regulates Wnt signaling (Zhen and DePinho 2010), overexpression causes oncogenesis and stem-like features (Su and Zhang 2018), can induce expression of pro-apoptosis genes (Mizutani and Taketani 2002) Is highly expressed in Testis
PRDM1	ENSG00000057657	Isoform A	PR/SET domain 1 [Source:HGNC Symbol;Acc:HGNC:9346]	Yes	Is a known transcriptional repressor and critical factor for PGC differentiation (Saitou 2016) (Tang 2015) Homozygous knock out still forms PGCs but they are dysfunctional and irregular (Vincent 2015)
SATB1	ENSG00000182568	Isoform 1	SATB homeobox 1 [Source:HGNC Symbol;Acc:HGNC:10541]	No	No known germline role. Is a critical TF for T lymphocyte lineage specification (Kakugawa 2017), neuron differentiation (Balamotis 2012), epidermis differentiation (Fessing 2011), and tumors (Kohwi-Shigematsu 2013). It is known to regulate quiescence in hematopoietic stem cells (Will 2013)
SOHLH1	ENSG00000165643	Isoform 1	spermatogenesis and oogenesis specific basic helix-loop-helix 1 [Source:HGNC Symbol;Acc:HGNC:27845]	Yes	Core factor in TF network driving mouse oogenesis (Hamazaki et al. 2020)
SOHLH2	ENSG00000120669	Isoform 2	spermatogenesis and oogenesis specific basic helix-loop-helix 2 [Source:HGNC Symbol;Acc:HGNC:26026]	No	Is upregulated in Primary Follicle germline cells and may be involved in primordial to primary transition (Y Zhang 2018). SOHLH1 and SOHLH2 is known to be upstream of LHX8. (Pangas 2006). SOHLH2 is a universal regulator of oocyte differentiation and affects LHX8 and oocyte development through the NOBOX pathway (Shin 2017)
SOX13	ENSG00000143842	Canonical	SRY-box transcription factor 13 [Source:HGNC Symbol;Acc:HGNC:11192]	No	High expression in antral follicle, may be involved in nuclear and cytoplasmic maturation of antral follicle with Sox15 (Y Zhang 2018)
SOX17	ENSG00000164736	Canonical	SRY-box transcription factor 17 [Source:HGNC Symbol;Acc:HGNC:18122]	Yes	Is a critical germline specifier involved in activating BLIMP1 and endoderm lineages (Irie 2015), (Mitusnaga 2017) (Saitou 2016) Is known to activate KLF4 and TFAP2CL1 to cause epigenome reprogramming (Tang 2015)
SP1	ENSG00000185591	Isoform B	Sp1 transcription factor [Source:HGNC Symbol;Acc:HGNC:11205]	No	zinc finger protein involved in differentiation, apoptosis, cell growth and chromatin remodeling and binds to GC rich promoters, it forms a complex with SOHLH1 and SOHLH2 and is critical for oogenesis and spermatogenesis (Toyoda and Miyzaki 2014)
STAT3	ENSG00000168610	Isoform 1	signal transducer and activator of transcription 3 [Source:HGNC Symbol;Acc:HGNC:11364]	Yes	Core factor in TF network driving mouse oogenesis (Hamazaki et al. 2020)
SUB1	ENSG00000113387	Isoform 1	SUB1 regulator of transcription [Source:HGNC Symbol;Acc:HGNC:19985]	Yes	Core factor in TF network driving mouse oogenesis (Hamazaki et al. 2020)
TBPL2	ENSG00000182521	Canonical	TATA-box binding protein like 2 [Source:HGNC Symbol;Acc:HGNC:19841]	Yes	Core factor in TF network driving mouse oogenesis (Hamazaki et al. 2020)
TCF3	ENSG00000071564	Isoform E12 (Pan-2)	transcription factor 3 [Source:HGNC Symbol;Acc:HGNC:11633]	No	Highly involved in notch signaling and lymphoid development, has been implicated in cancer and tissue specific differentiation (Ikawa and Murre 2006), has been shown in flies that Notch signaling is critical for oogenesis and defining the germ cell niche (Xu and Gridley 2012) has been implicated in playing a critical role in spermatogenesis by regulating Wnt activity (Zhu and Li 2016)
TCF4	ENSG00000196628	Isoform a	transcription factor 4 [Source:HGNC Symbol;Acc:HGNC:11634]	No	Immunoglobulin transcription factor that is primarily responsible for neural differentiation and development, is highly expressed in testis (Sepp and Timmusk 2011)
TFAP2C	ENSG00000087510	Isoform 1	transcription factor AP-2 gamma [Source:HGNC Symbol;Acc:HGNC:11744]	Yes	Is a critical specifier of PGC-LCs, forming an activity network with SOX17 and BLIMP1 (Saitou 2016). Is a master activator of multiple PGC genes, including OCT4 naïve enhancer (Chen 2018) Regulates NANOS3 and KLF4 (Schemmer 2013) Can act both down and upstream of Sox17 to repress somatic lineage and promote germline fate (Chen 2019)
TOX	ENSG00000198846	Canonical	thymocyte selection associated high mobility group box [Source:HGNC Symbol;Acc:HGNC:18988]	No	No known germline role. A thymocyte selection TF box factor that is involved in immune modulation and cancer susceptibility, has been implicated in immune differentiation and for opening Chromatin for TF binding (Yu and Li 2015)
ZBTB39	ENSG00000166860	Canonical	zinc finger and BTB domain containing 39 [Source:HGNC Symbol;Acc:HGNC:29014]	No	Came out in a co-IP with the protein Foxd3 which is a known inhibitor of PGC specification, was never followed up on. (Respuela 2016). Is upregulated in Setdb1 Kos in PGCs (S Liu 2015)
ZGLP1	ENSG00000220201	Canonical	zinc finger GATA like protein 1 [Source:HGNC Symbol;Acc:HGNC:37245]	No	top gene candidate for regulating retinoic acid response pathway in fetal germ cells to initiate meiosis, (Li and Qiao 2017) is expressed inside the germline cells to respond to somatic signaling to inhibit mitosis and enter meiosis (Austin and Kimble 1997)
ZNF155	ENSG00000204920	Isoform 1	zinc finger protein 155 [Source:HGNC Symbol;Acc:HGNC:12940]	No	No known germline role. Herpes Simplex Virus Infection, Implicated in breast cancer tumorigenesis (q Li 2014), can be activated by KLF genes during embryogenesis (J Pontis 2019)
ZNF281	ENSG00000162702	Isoform 1	zinc finger protein 281 [Source:HGNC Symbol;Acc:HGNC:13075]	No	No known germline role. Known to be expressed in antral follicles (Zhang et al. 2018). A novel zin finger TF identified in reprogramming of fibroblast to cardiac cells based on Gata4 binding (Zhou and Olson 2017) has been identified as an inhibitor of neuronal differentiation (Pieraccioli and Melino 2018)
ZNF419	ENSG00000105136	Isoform 1	zinc finger protein 419 [Source:HGNC Symbol;Acc:HGNC:20648]	No	No known germline role. Has been implicated as a mutational hotspot in colorectal cancer (Kondelin and Aaltonen 2018) and is involved in the Herpes Simplex 1 pathway
ZNF574	ENSG00000105732	Isoform 1	zinc finger protein 574 [Source:HGNC Symbol;Acc:HGNC:26166]	No	No known germline role. zinc finger protein that is highly expressed in testis, unknown function, thought to involve Oct signaling (Hodson and Staudt 2016)
